# Supplementary material
Source: MDPI journal article supplement (https://www.mdpi.com/2673-8449/2/1/3)
Supplement: s1 [file s1 › biologics-1528406-supplementary.pdf]

# Ramachandran Plot

saves

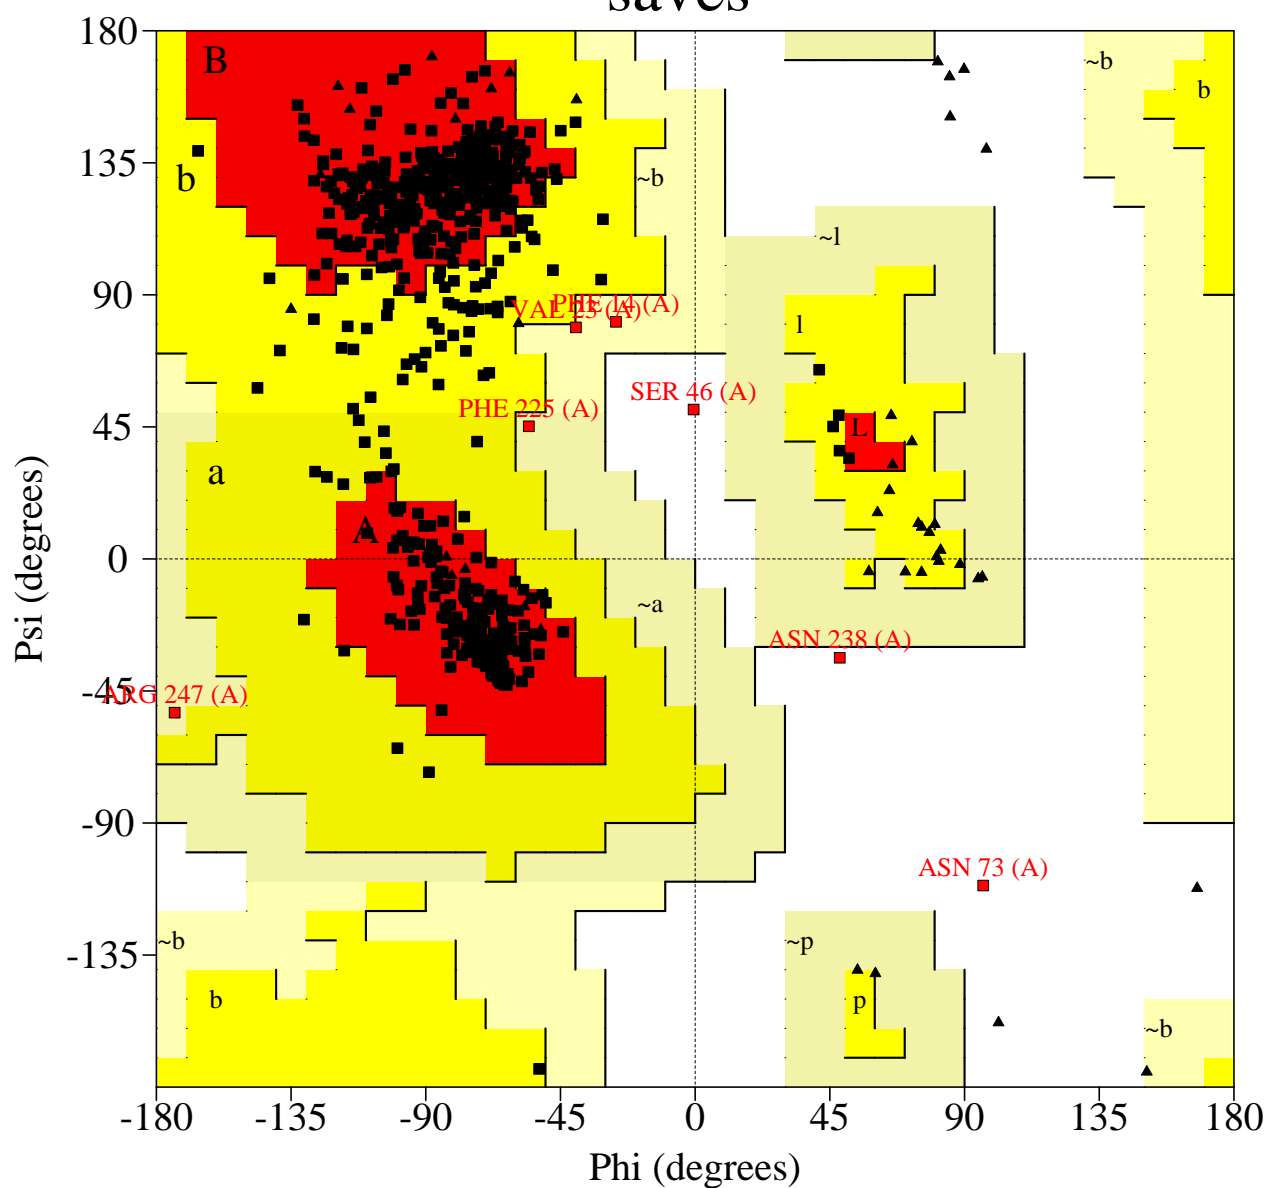

Based on an analysis of 118 structures of resolution of at least 2.0 Angstroms and R-factor no greater than 20%, a good quality model would be expected to have over 90% in the most favoured regions.

# Ramachandran Plot

saves

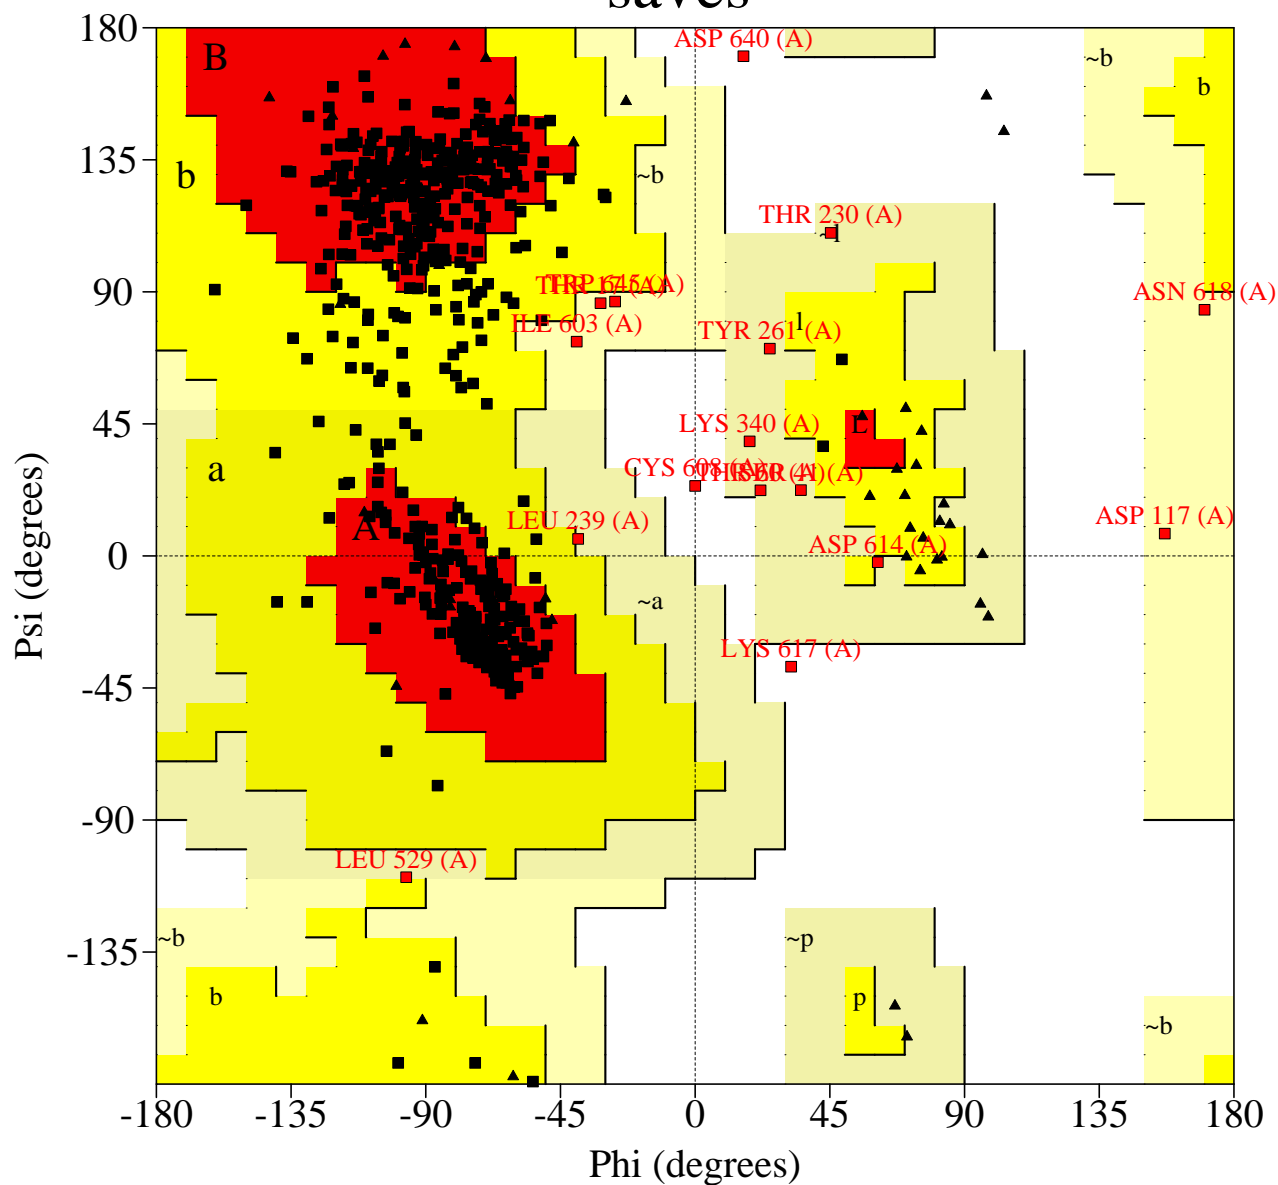

## Plot statistics

|                                                      |     |        |
|------------------------------------------------------|-----|--------|
| Residues in most favoured regions [A,B,L]            | 490 | 83.5%  |
| Residues in additional allowed regions [a,b,l,p]     | 81  | 13.8%  |
| Residues in generously allowed regions [~a,~b,~l,~p] | 13  | 2.2%   |
| Residues in disallowed regions                       | 3   | 0.5%   |
| -----                                                |     |        |
| Number of non-glycine and non-proline residues       | 587 | 100.0% |
| Number of end-residues (excl. Gly and Pro)           | 2   |        |
| Number of glycine residues (shown as triangles)      | 53  |        |
| Number of proline residues                           | 34  |        |
| -----                                                |     |        |
| Total number of residues                             | 676 |        |

Based on an analysis of 118 structures of resolution of at least 2.0 Angstroms and R-factor no greater than 20%, a good quality model would be expected to have over 90% in the most favoured regions.

# Ramachandran Plot

saves

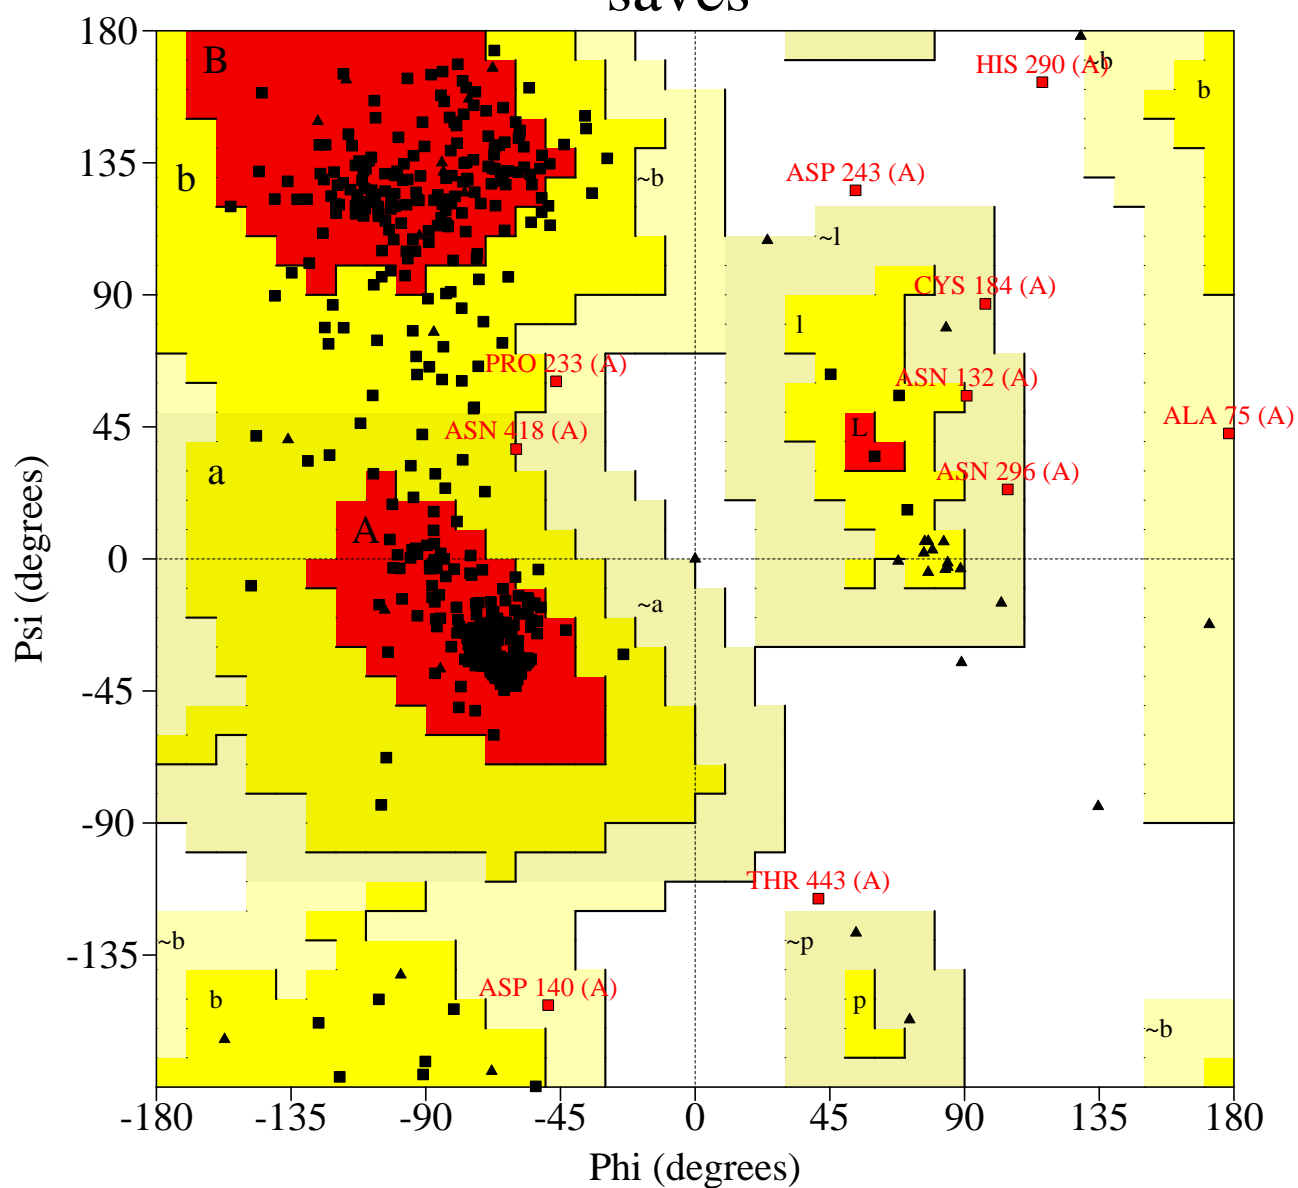

## Plot statistics

|                                                      |     |        |
|------------------------------------------------------|-----|--------|
| Residues in most favoured regions [A,B,L]            | 407 | 84.6%  |
| Residues in additional allowed regions [a,b,l,p]     | 65  | 13.5%  |
| Residues in generously allowed regions [~a,~b,~l,~p] | 6   | 1.2%   |
| Residues in disallowed regions                       | 3   | 0.6%   |
| -----                                                |     |        |
| Number of non-glycine and non-proline residues       | 481 | 100.0% |
| Number of end-residues (excl. Gly and Pro)           | 2   |        |
| Number of glycine residues (shown as triangles)      | 37  |        |
| Number of proline residues                           | 14  |        |
| -----                                                |     |        |
| Total number of residues                             | 534 |        |

Based on an analysis of 118 structures of resolution of at least 2.0 Angstroms and R-factor no greater than 20%, a good quality model would be expected to have over 90% in the most favoured regions.

# Ramachandran Plot

saves

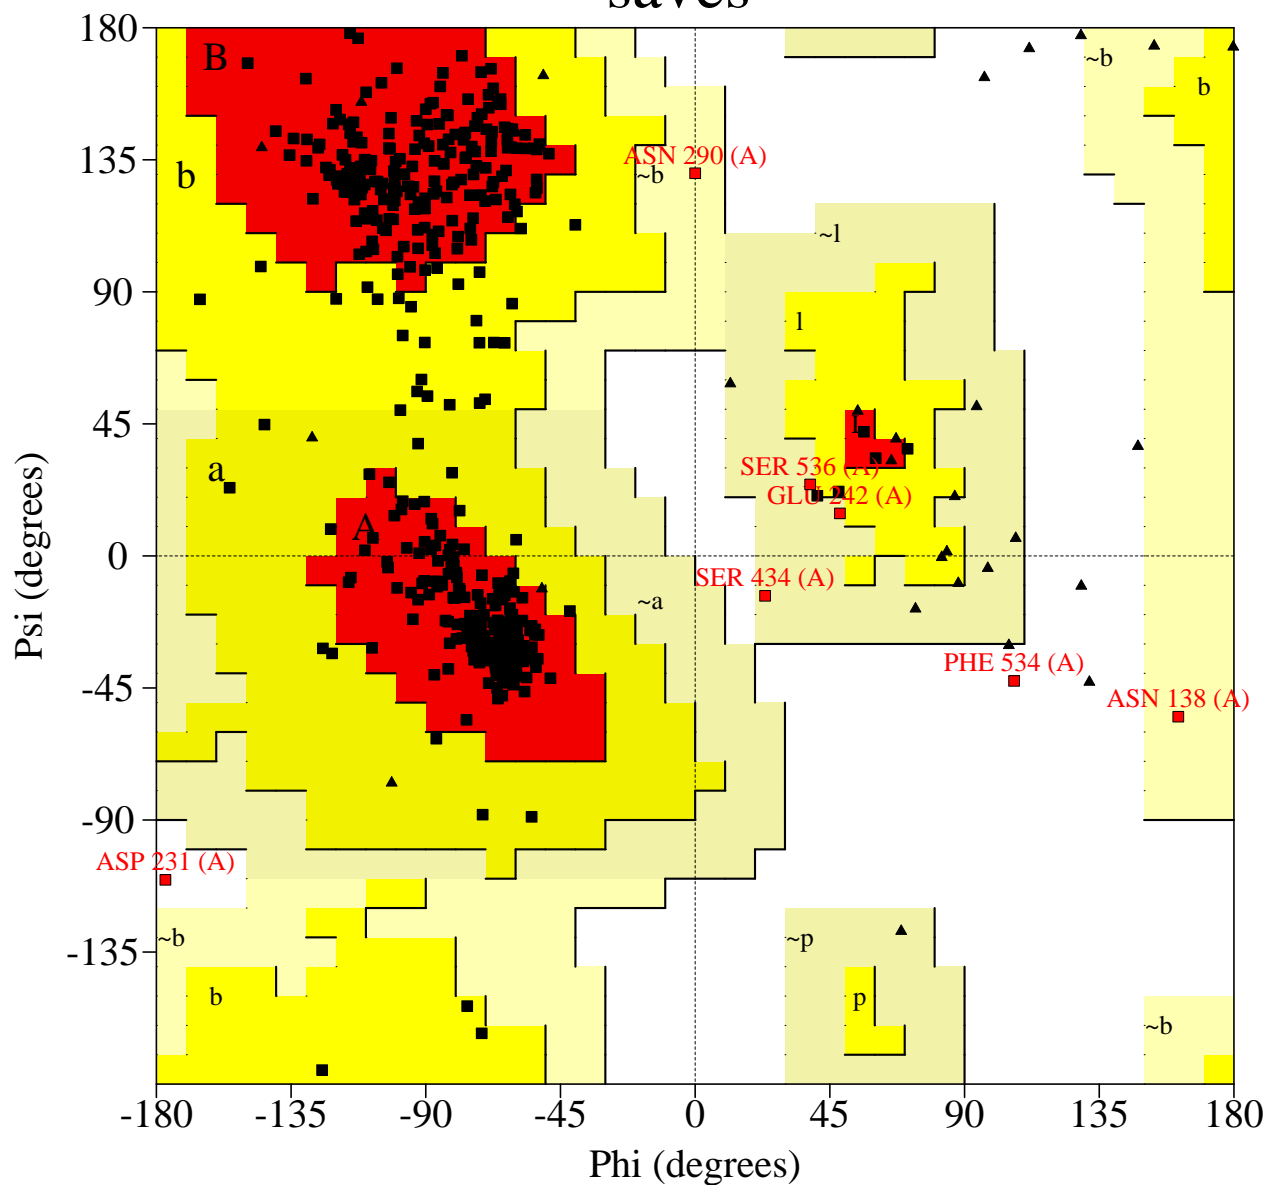

## Plot statistics

|                                                      |     |        |
|------------------------------------------------------|-----|--------|
| Residues in most favoured regions [A,B,L]            | 452 | 89.9%  |
| Residues in additional allowed regions [a,b,l,p]     | 44  | 8.7%   |
| Residues in generously allowed regions [~a,~b,~l,~p] | 5   | 1.0%   |
| Residues in disallowed regions                       | 2   | 0.4%   |
| -----                                                |     |        |
| Number of non-glycine and non-proline residues       | 503 | 100.0% |
| Number of end-residues (excl. Gly and Pro)           | 2   |        |
| Number of glycine residues (shown as triangles)      | 30  |        |
| Number of proline residues                           | 32  |        |
| -----                                                |     |        |
| Total number of residues                             | 567 |        |

Based on an analysis of 118 structures of resolution of at least 2.0 Angstroms and R-factor no greater than 20%, a good quality model would be expected to have over 90% in the most favoured regions.

# Ramachandran Plot

saves

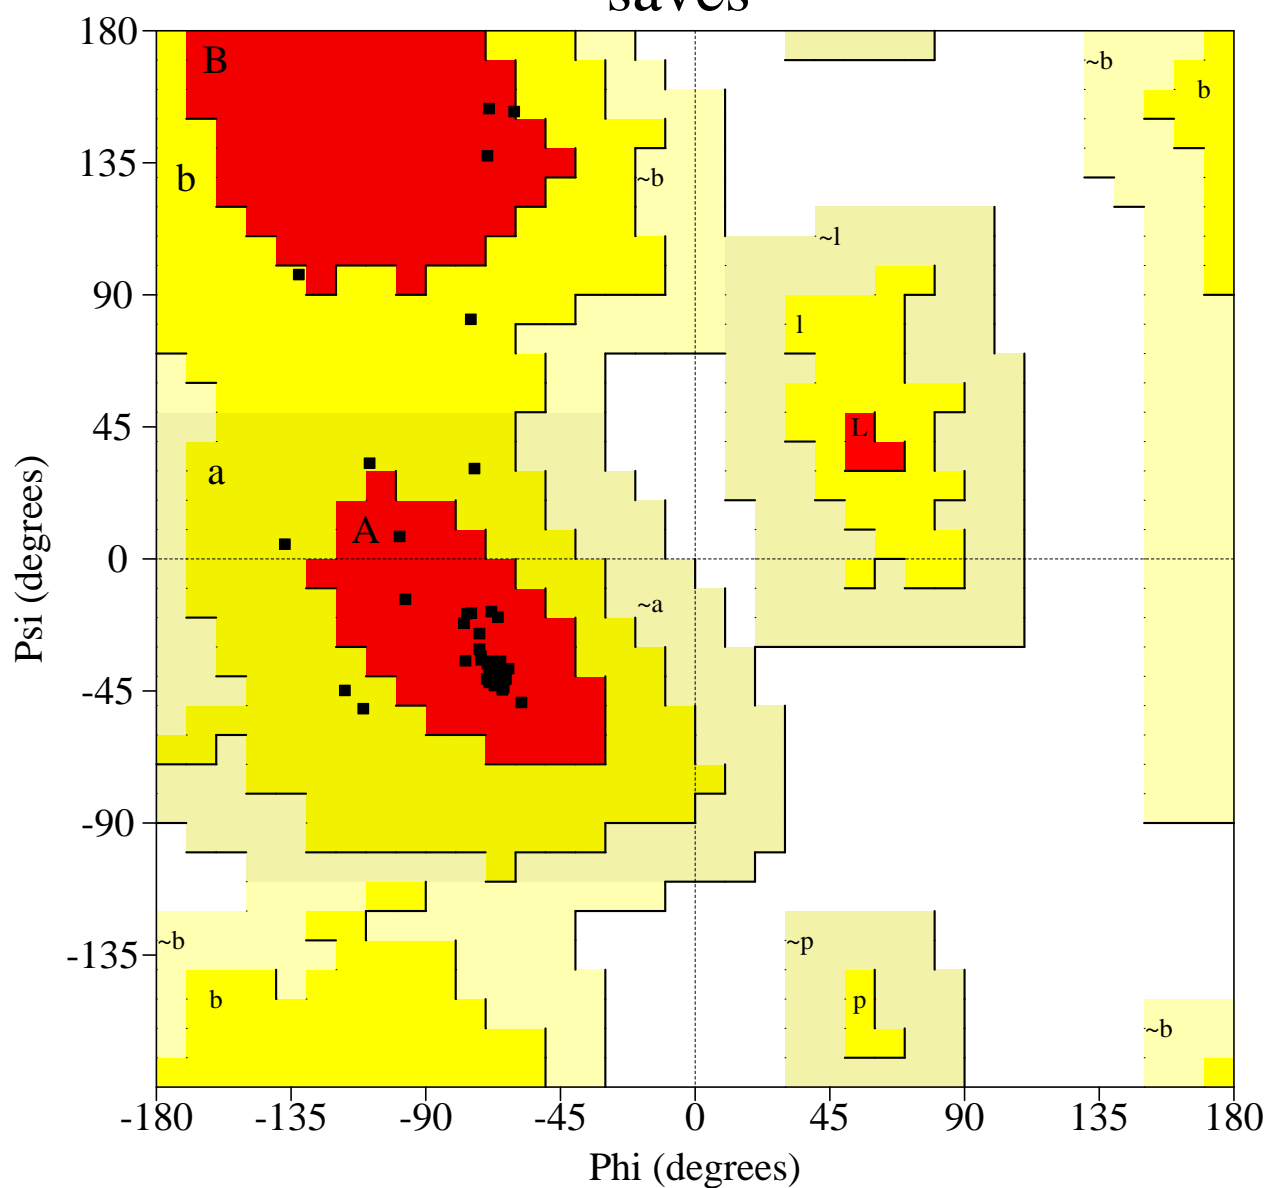

## Plot statistics

|                                                      |    |        |
|------------------------------------------------------|----|--------|
| Residues in most favoured regions [A,B,L]            | 34 | 82.9%  |
| Residues in additional allowed regions [a,b,l,p]     | 7  | 17.1%  |
| Residues in generously allowed regions [~a,~b,~l,~p] | 0  | 0.0%   |
| Residues in disallowed regions                       | 0  | 0.0%   |
| <hr/>                                                |    |        |
| Number of non-glycine and non-proline residues       | 41 | 100.0% |
| Number of end-residues (excl. Gly and Pro)           | 1  |        |
| Number of glycine residues (shown as triangles)      | 1  |        |
| Number of proline residues                           | 3  |        |
| <hr/>                                                |    |        |
| Total number of residues                             | 46 |        |

Based on an analysis of 118 structures of resolution of at least 2.0 Angstroms and R-factor no greater than 20%, a good quality model would be expected to have over 90% in the most favoured regions.

# Ramachandran Plot

saves

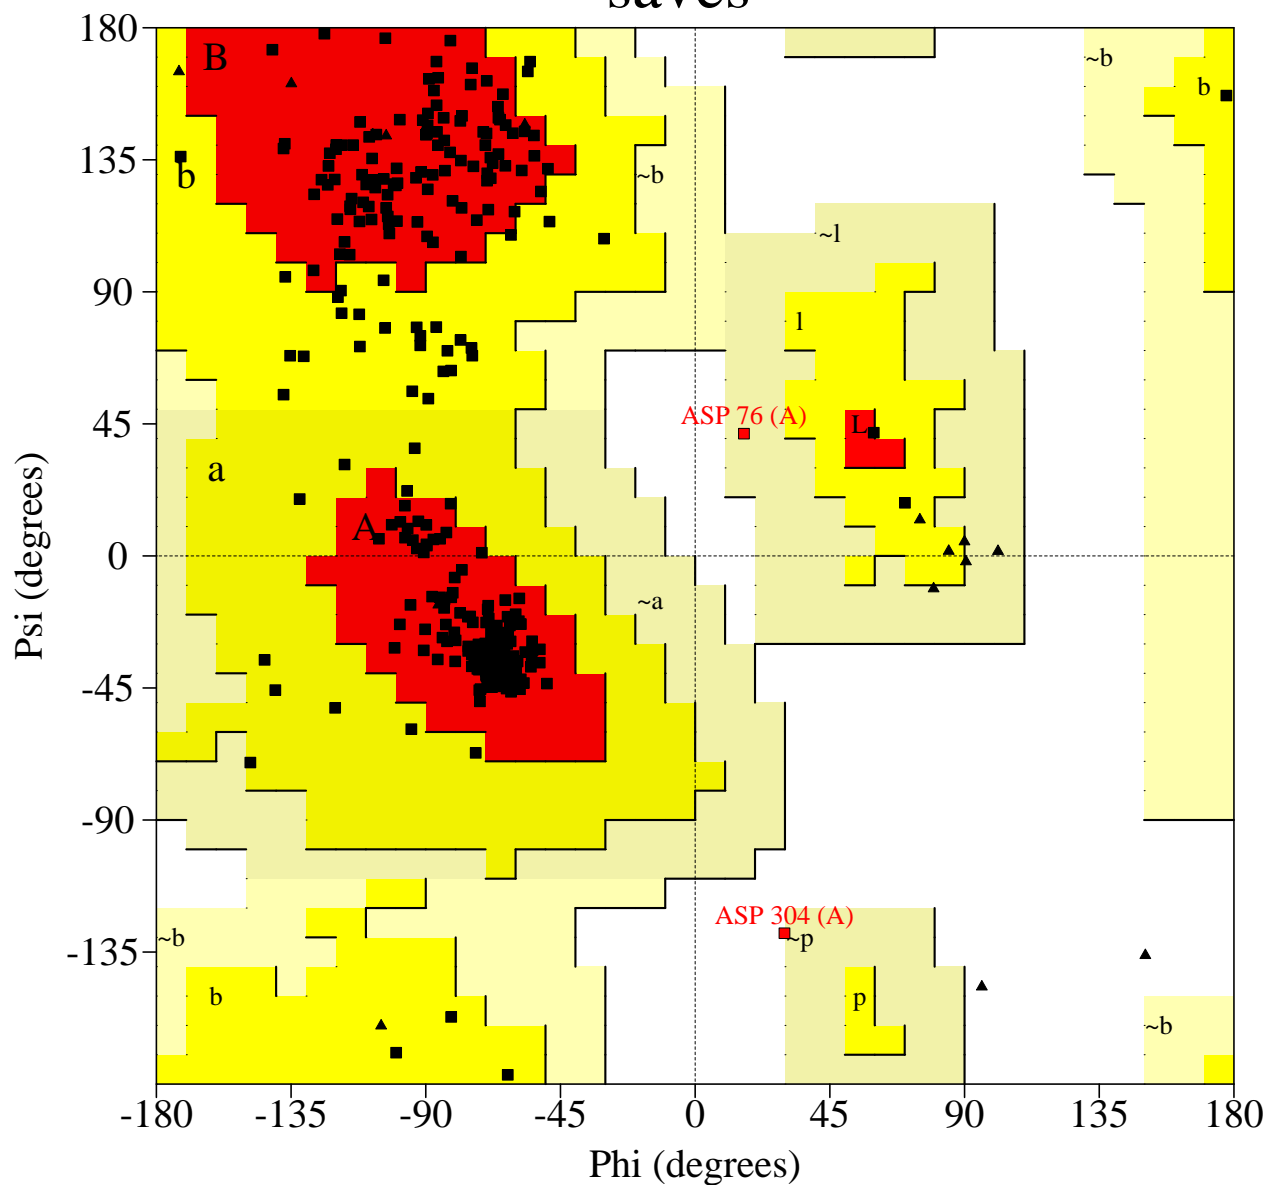

## Plot statistics

|                                                      |     |        |
|------------------------------------------------------|-----|--------|
| Residues in most favoured regions [A,B,L]            | 295 | 87.5%  |
| Residues in additional allowed regions [a,b,l,p]     | 40  | 11.9%  |
| Residues in generously allowed regions [~a,~b,~l,~p] | 1   | 0.3%   |
| Residues in disallowed regions                       | 1   | 0.3%   |
| -----                                                |     |        |
| Number of non-glycine and non-proline residues       | 337 | 100.0% |
| Number of end-residues (excl. Gly and Pro)           | 2   |        |
| Number of glycine residues (shown as triangles)      | 23  |        |
| Number of proline residues                           | 20  |        |
| -----                                                |     |        |
| Total number of residues                             | 382 |        |

Based on an analysis of 118 structures of resolution of at least 2.0 Angstroms and R-factor no greater than 20%, a good quality model would be expected to have over 90% in the most favoured regions.

# Ramachandran Plot

saves

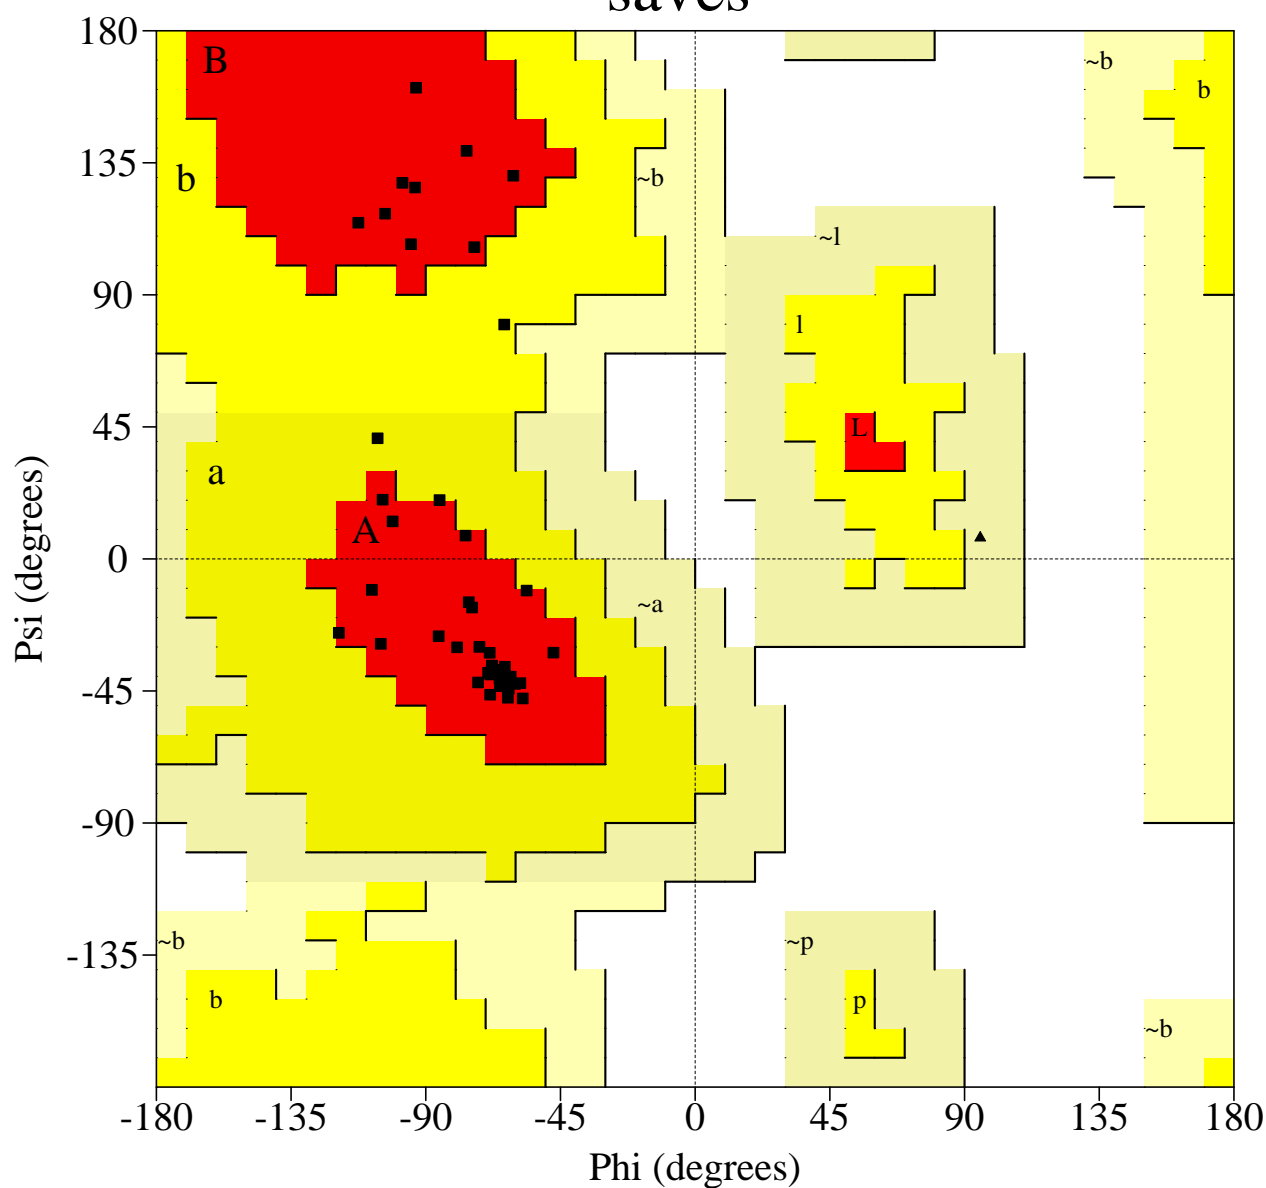

## Plot statistics

|                                                      |    |        |
|------------------------------------------------------|----|--------|
| Residues in most favoured regions [A,B,L]            | 43 | 95.6%  |
| Residues in additional allowed regions [a,b,l,p]     | 2  | 4.4%   |
| Residues in generously allowed regions [~a,~b,~l,~p] | 0  | 0.0%   |
| Residues in disallowed regions                       | 0  | 0.0%   |
| -----                                                |    |        |
| Number of non-glycine and non-proline residues       | 45 | 100.0% |
| Number of end-residues (excl. Gly and Pro)           | 1  |        |
| Number of glycine residues (shown as triangles)      | 2  |        |
| Number of proline residues                           | 2  |        |
| -----                                                |    |        |
| Total number of residues                             | 50 |        |

Based on an analysis of 118 structures of resolution of at least 2.0 Angstroms and R-factor no greater than 20%, a good quality model would be expected to have over 90% in the most favoured regions.

# Ramachandran Plot

saves

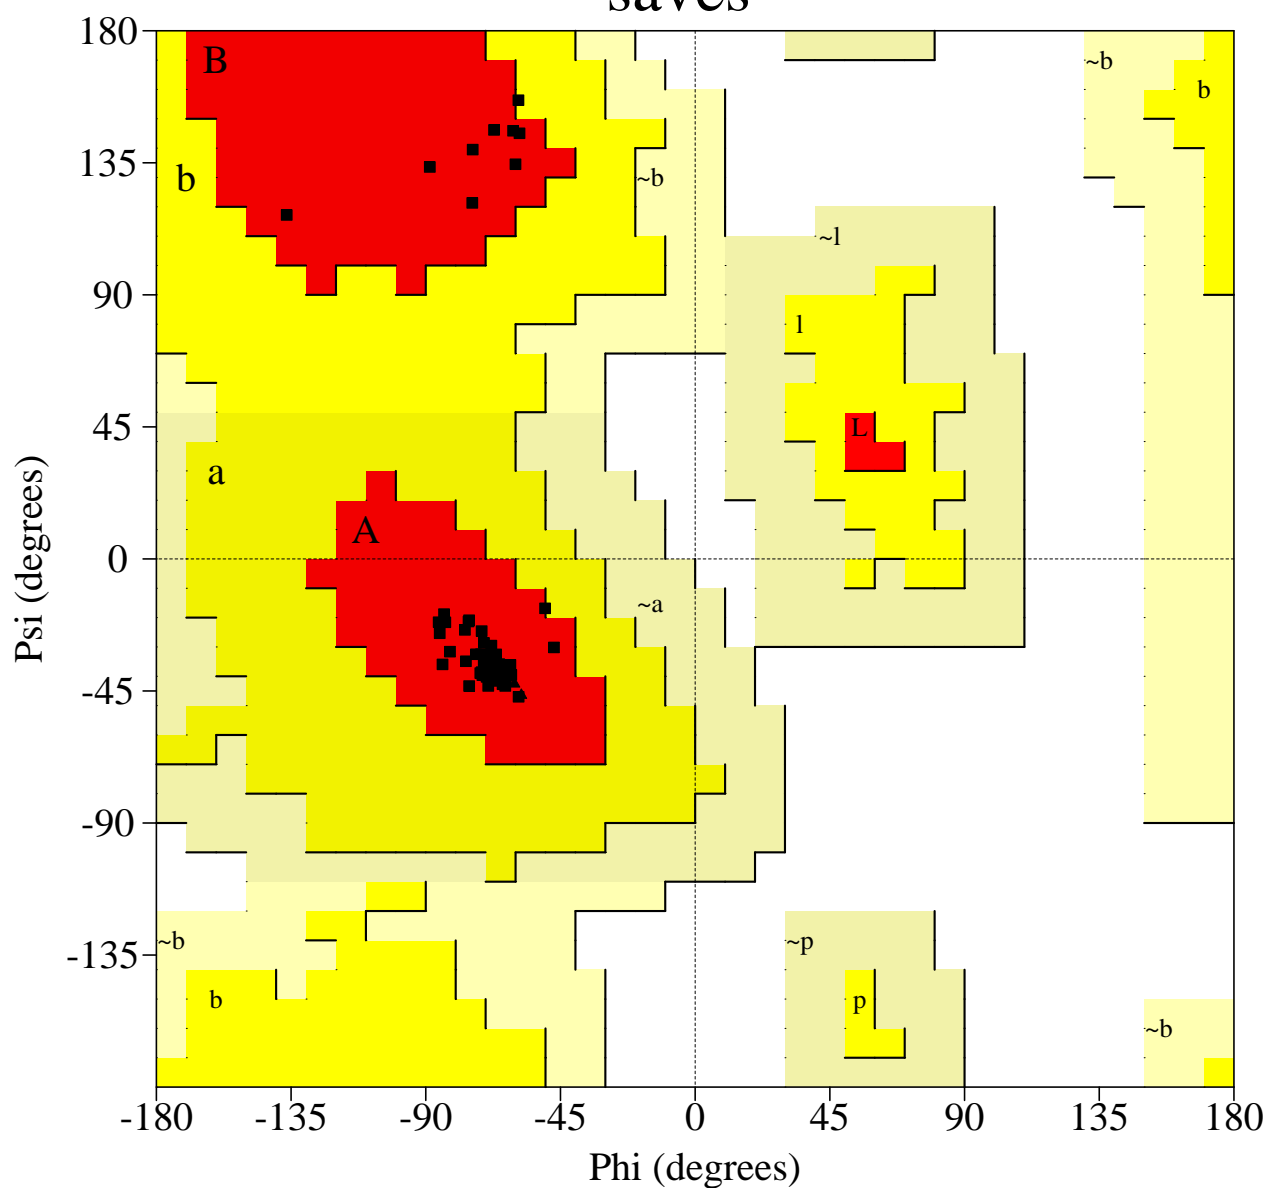

## Plot statistics

|                                                      |    |        |
|------------------------------------------------------|----|--------|
| Residues in most favoured regions [A,B,L]            | 58 | 100.0% |
| Residues in additional allowed regions [a,b,l,p]     | 0  | 0.0%   |
| Residues in generously allowed regions [~a,~b,~l,~p] | 0  | 0.0%   |
| Residues in disallowed regions                       | 0  | 0.0%   |
| -----                                                |    |        |
| Number of non-glycine and non-proline residues       | 58 | 100.0% |
| Number of end-residues (excl. Gly and Pro)           | 1  |        |
| Number of glycine residues (shown as triangles)      | 4  |        |
| Number of proline residues                           | 7  |        |
| -----                                                |    |        |
| Total number of residues                             | 70 |        |

Based on an analysis of 118 structures of resolution of at least 2.0 Angstroms and R-factor no greater than 20%, a good quality model would be expected to have over 90% in the most favoured regions.

# Ramachandran Plot

saves

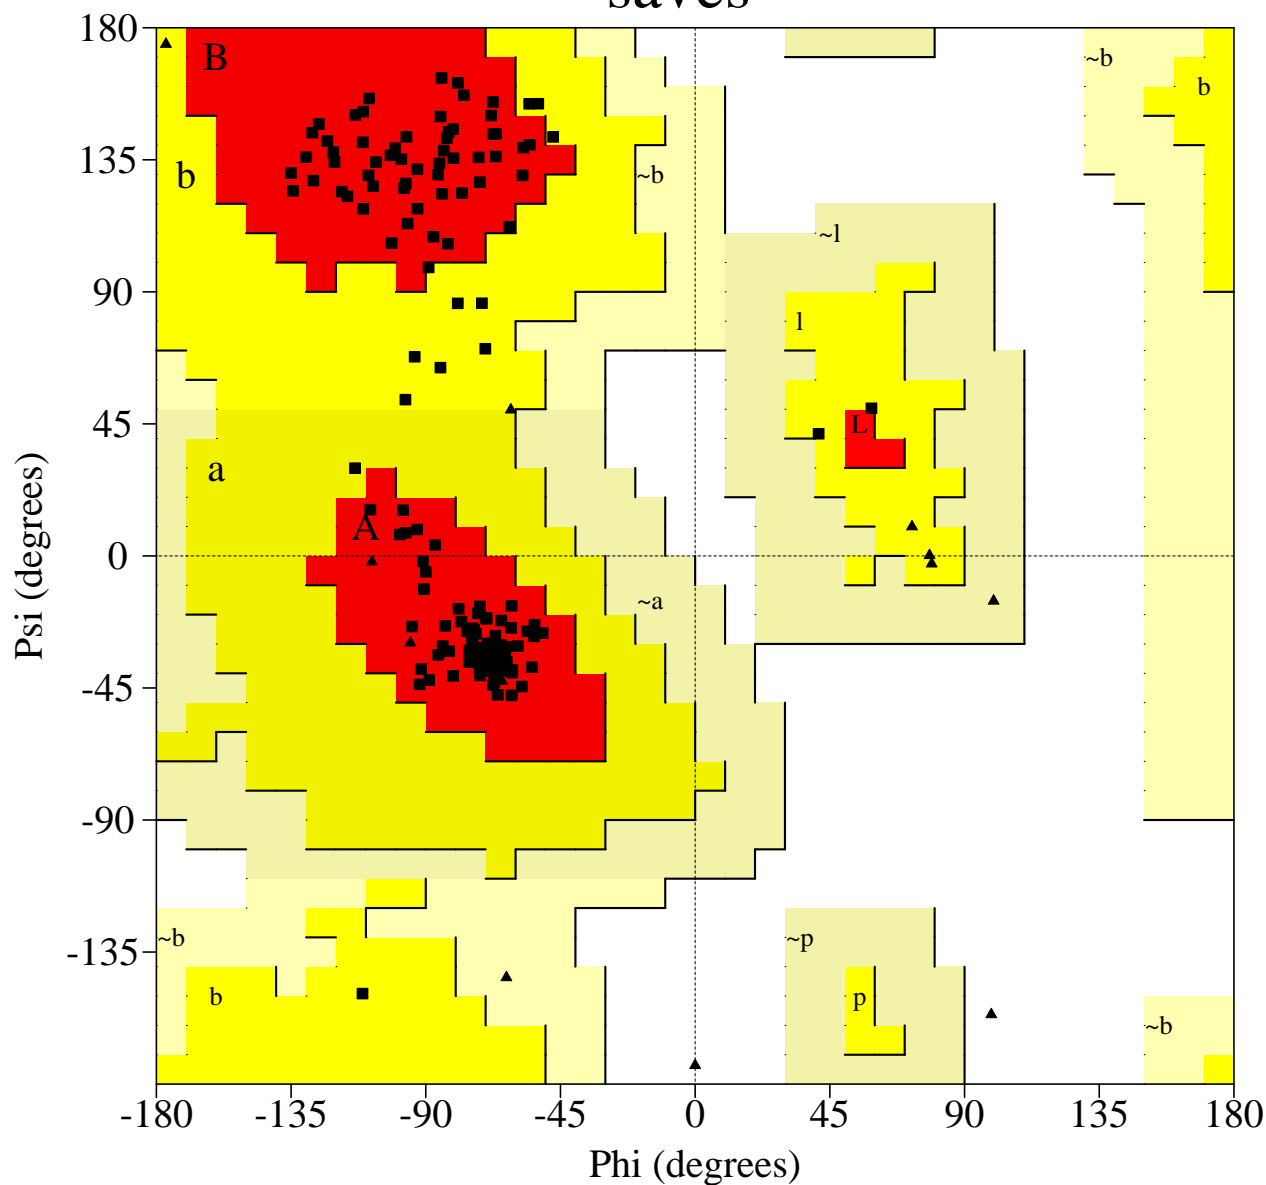

## Plot statistics

|                                                      |     |        |
|------------------------------------------------------|-----|--------|
| Residues in most favoured regions [A,B,L]            | 132 | 90.4%  |
| Residues in additional allowed regions [a,b,l,p]     | 14  | 9.6%   |
| Residues in generously allowed regions [~a,~b,~l,~p] | 0   | 0.0%   |
| Residues in disallowed regions                       | 0   | 0.0%   |
| -----                                                |     |        |
| Number of non-glycine and non-proline residues       | 146 | 100.0% |
| Number of end-residues (excl. Gly and Pro)           | 2   |        |
| Number of glycine residues (shown as triangles)      | 14  |        |
| Number of proline residues                           | 5   |        |
| -----                                                |     |        |
| Total number of residues                             | 167 |        |

Based on an analysis of 118 structures of resolution of at least 2.0 Angstroms and R-factor no greater than 20%, a good quality model would be expected to have over 90% in the most favoured regions.

# Ramachandran Plot

saves

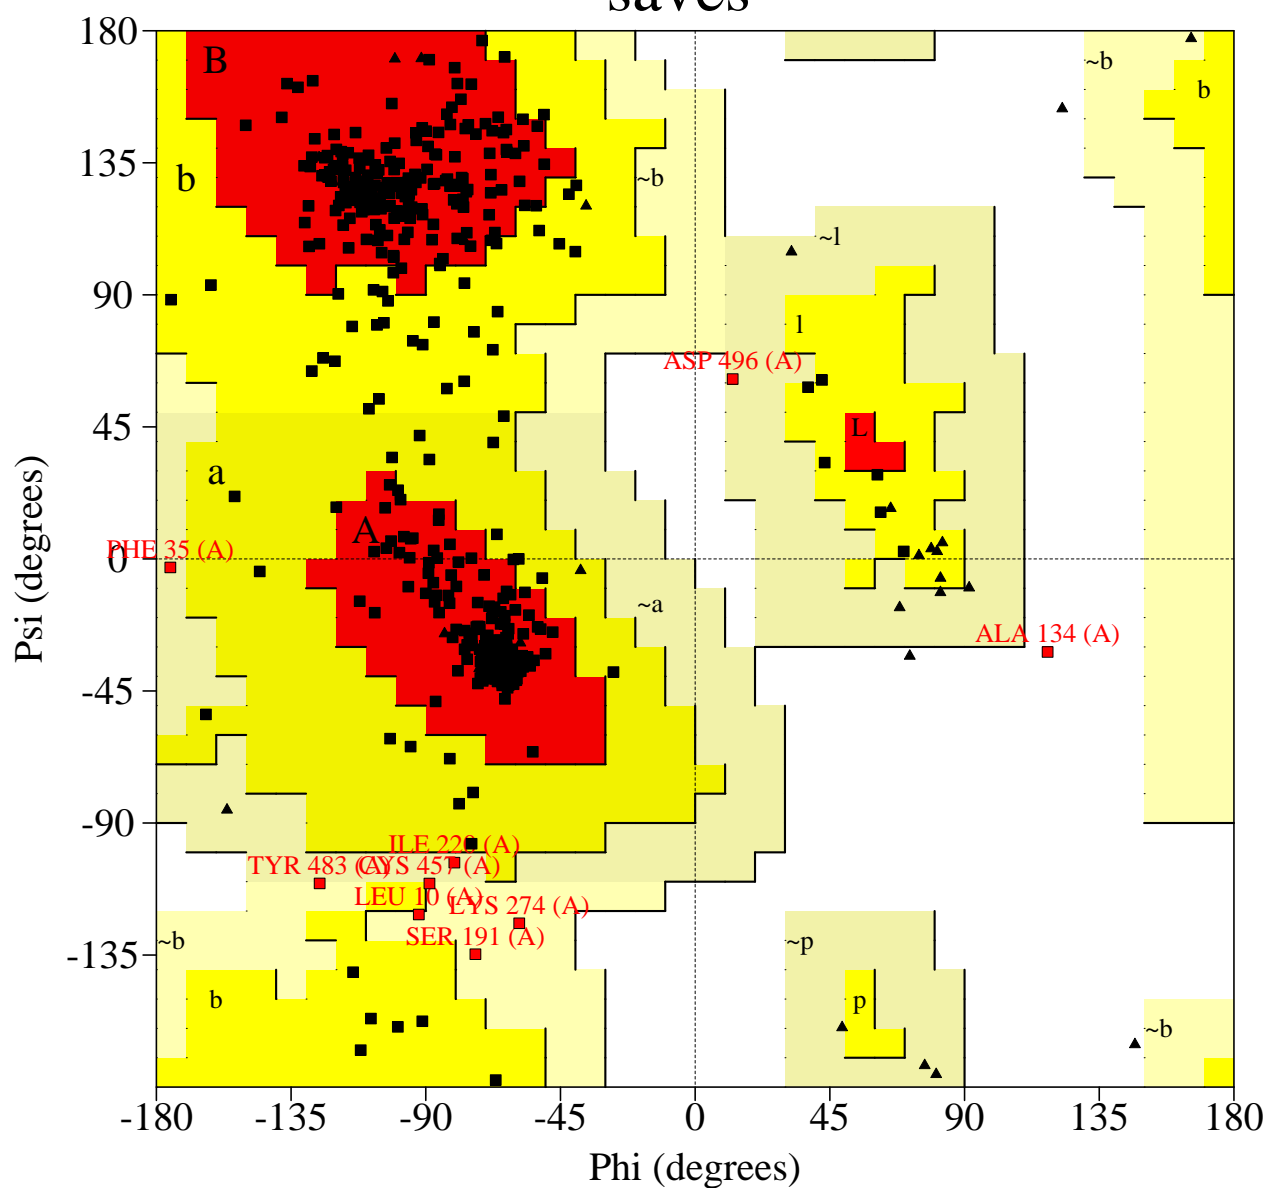

## Plot statistics

|                                                      |     |        |
|------------------------------------------------------|-----|--------|
| Residues in most favoured regions [A,B,L]            | 419 | 85.7%  |
| Residues in additional allowed regions [a,b,l,p]     | 61  | 12.5%  |
| Residues in generously allowed regions [~a,~b,~l,~p] | 8   | 1.6%   |
| Residues in disallowed regions                       | 1   | 0.2%   |
| -----                                                |     |        |
| Number of non-glycine and non-proline residues       | 489 | 100.0% |
| Number of end-residues (excl. Gly and Pro)           | 2   |        |
| Number of glycine residues (shown as triangles)      | 33  |        |
| Number of proline residues                           | 20  |        |
| -----                                                |     |        |
| Total number of residues                             | 544 |        |

Based on an analysis of 118 structures of resolution of at least 2.0 Angstroms and R-factor no greater than 20%, a good quality model would be expected to have over 90% in the most favoured regions.

# Ramachandran Plot

saves

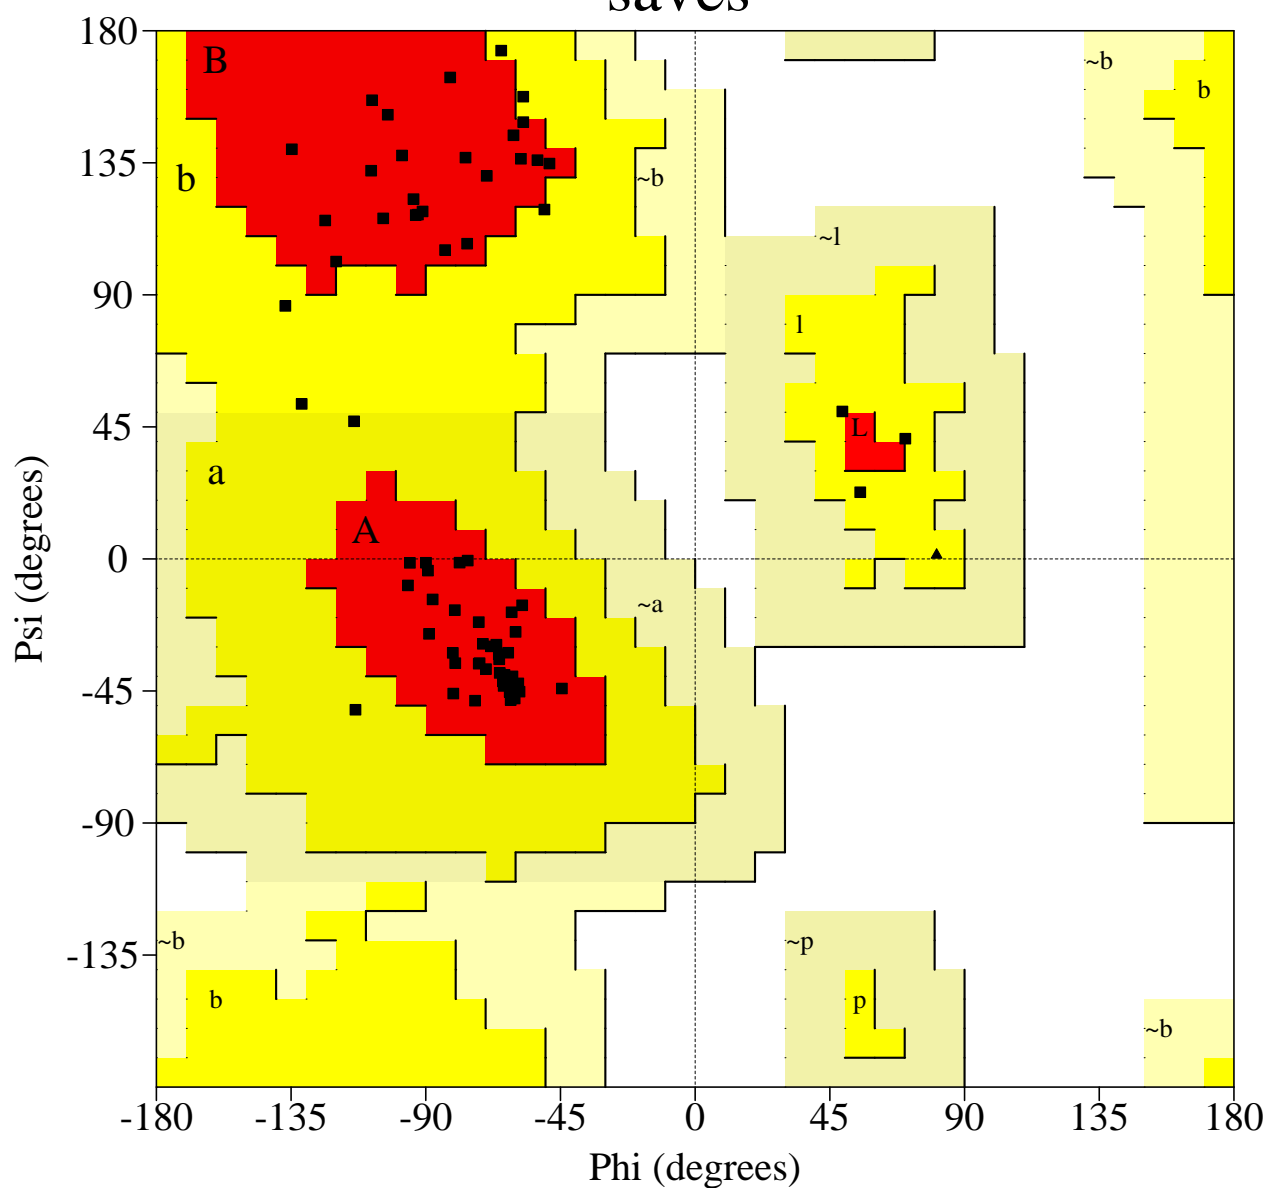

## Plot statistics

|                                                      |    |        |
|------------------------------------------------------|----|--------|
| Residues in most favoured regions [A,B,L]            | 59 | 88.1%  |
| Residues in additional allowed regions [a,b,l,p]     | 8  | 11.9%  |
| Residues in generously allowed regions [~a,~b,~l,~p] | 0  | 0.0%   |
| Residues in disallowed regions                       | 0  | 0.0%   |
| -----                                                |    |        |
| Number of non-glycine and non-proline residues       | 67 | 100.0% |
| Number of end-residues (excl. Gly and Pro)           | 1  |        |
| Number of glycine residues (shown as triangles)      | 1  |        |
| Number of proline residues                           | 8  |        |
| -----                                                |    |        |
| Total number of residues                             | 77 |        |

Based on an analysis of 118 structures of resolution of at least 2.0 Angstroms and R-factor no greater than 20%, a good quality model would be expected to have over 90% in the most favoured regions.
